# Supplementary material
Source: PubMed Central journal article supplement (PMC7863875)
Supplement: supp_RA120.015757_163087_2_supp_608767_qh3byr.pdf [file supp_RA120.015757_163087_2_supp_608767_qh3byr.pdf]

Supporting Information for

**Identification of a domain critical for *Staphylococcus aureus* LukED receptor targeting and lysis of erythrocytes**

Marilyn T. Vasquez<sup>1\*</sup>, Ashira Lubkin<sup>1\*</sup>, Tamara Reyes-Robles<sup>1#</sup>, Christopher J. Day<sup>2</sup>, Keenan A. Lacey<sup>1</sup>,  
and Michael P. Jennings<sup>2</sup>, Victor J. Torres<sup>1^</sup>

<sup>1</sup>Department of Microbiology, New York University Grossman School of Medicine, New York, NY 10016. <sup>2</sup>Institute for Glycomics, Griffith University, Gold Coast, QLD 4222, Australia.

\*These authors contributed equally to this work.

<sup>#</sup>Present address: Merck Cambridge Exploratory Science Center, 320 Bent Street, Cambridge, MA 02141, USA

<sup>^</sup>To whom correspondence should be addressed:  
Victor J. Torres ([victor.torres@nyulangone.org](mailto:victor.torres@nyulangone.org); Tel: 212-263-9232)

**Running title:** Characterization of the LukED-DARC interaction

**Materials Included:**

Table S1

Figure S1

Figure S2

**Table S1.** Primers used in this study.

| Primer  | Primer Sequence                                                 |
|---------|-----------------------------------------------------------------|
| VJT629  | 5' CCCGGATCCAATACTAATATTGAAAATATTGGTGATG 3'                     |
| VJT629  | 5' CCCGGATCCAATACTAATATTGAAAATATTGGTGATG 3'                     |
| VJT903  | 5' CTATATGGTTTATATCCAACAAATAAATATCTATCATGCGCAGA 3'              |
| VJT914  | 5' GACTATTTTGTTCAGACAATCAATTGCCACCTTTAGTTCAAAG 3'               |
| VJT1114 | 5' CCCCTGCAGTTAATTATGTCCTTTCACCTTAATTTTCG 3'                    |
| VJT1117 | 5' CCCCTGCAGTTAATTATGTCCTTTCACCTTAATTTTCATG 3'                  |
| VJT1186 | 5' CTGAAAATGAAGTTCTTGAATTGATAAAACCTTG 3'                        |
| VJT1187 | 5' AGAACTTCATTTTCAGATGTGAAGGGTAGTGGATATGAATTAACAAACGAATGATT 3'  |
| VJT1188 | 5' AATCATTGTTTTAGTTAATTCATATCCACTACCCTTCACATCTGAAAATGAAGTTCT 3' |
| VJT1189 | 5' GCAAGGTTTTATCAATTCAAGAACTTCATTTTCAG 3'                       |
| VJT1190 | 5' CATAACTCTTTTGGGTATAACTAATTGTTTTTG 3'                         |
| VJT1191 | 5' ACCCAAAGAGTTATGTCAGTGAAGTAGACAAG 3'                          |
| VJT1192 | 5' CTTGTCTACTTCACTGACATAACTCTTTTGGGT 3'                         |
| VJT1193 | 5' CAGTGAAGTAGACAAGCAAAATTCAAAAAGTGTTCC 3'                      |
| VJT1194 | 5' CATCAGGCGTAACAAATTCATTAGCTTTTATTCCCC 3'                      |
| VJT1195 | 5' GAATTTGTTACGCCTGATGGAAAAAATCTGCGCATGATAGATAT 3'              |
| VJT1196 | 5' ATATCTATCATGCGCAGATTTTTTTCCATCAGGCGTAACAAATTC 3'             |
| VJT1197 | 5' CTGCGCATGATAGATATTTATTTGTTGGATATAAAC 3'                      |
| VJT1198 | 5' GGACCATTTGGACTTTGAACAATAAATTTGGATC 3'                        |
| VJT1199 | 5' CAAAGTCCAAATGGTCCAACAGGTTTCAGCAAGAGAATATTTTGCT 3'            |
| VJT1200 | 5' AGCAAATATTCTCTTGCTGAACCTGTTGGACCATTTGGACTTTG 3'              |
| VJT1208 | 5' GCGCGGATCCGATAACAATATTGAGAATATTGG 3'                         |

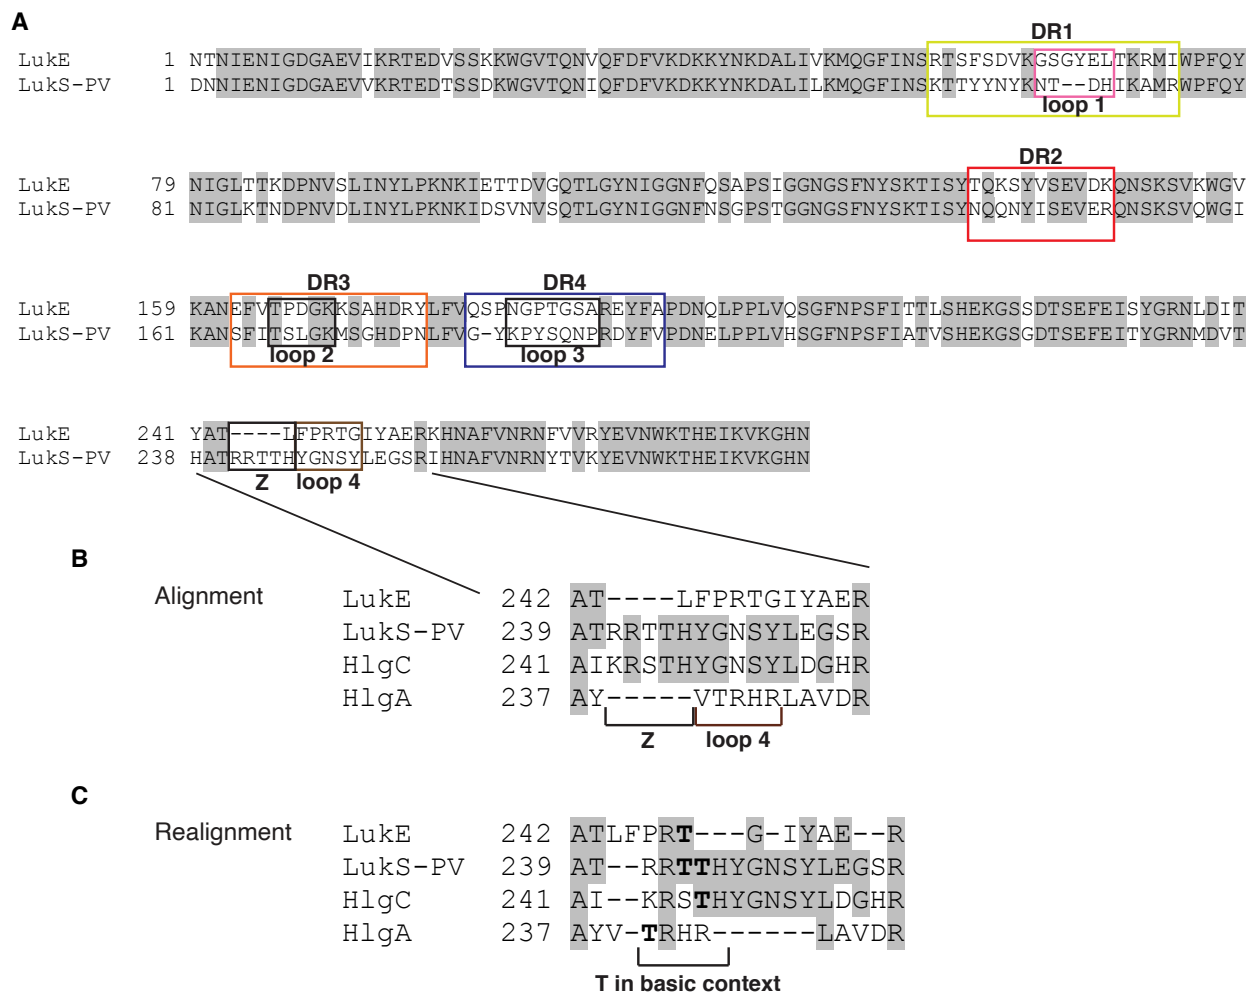

**Figure S1.** Alignment of LukE and LukS-PV.

*A*, Alignment of the mature sequences of LukE and LukS-PV, as in (8). Amino acids highlighted in gray are identical. Regions of low amino acid identity between the two toxins (referred to as divergence regions or DRs) from (8) are noted, as are the loops from (16). *B*, Magnification of alignment from (16) of residues 242-254 of LukE and aligned sections of the other S subunits. *C*, Realignment to highlight shared threonine and basic residues.

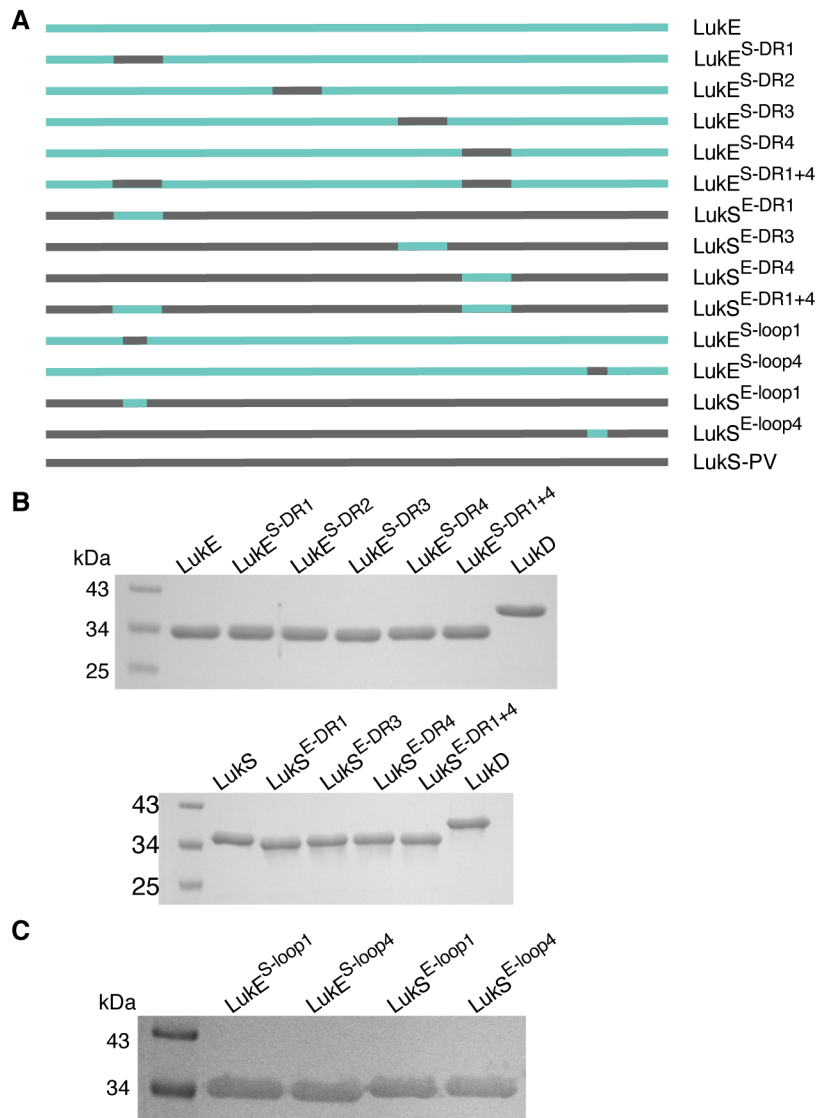

**Figure S2.** Toxin chimeras used in this study.

*A*, Diagram of toxin chimeras used. *B*, Coomassie-blue stained SDS-PAGE gels of 2  $\mu$ g purified LukE and LukS chimeras. *C*, Coomassie-blue stained SDS-PAGE gel of 2  $\mu$ g purified LukE and LukS loop chimeras as in (16).
